# Supplementary material for: Reconstructing emission pathways for developing countries
Source: Research Square preprint supplement (doi:10.21203/rs.3.rs-5988032/v1), 2025-02-19
Supplement: Supplementary file 1 [file f415270b9be3e3941b317a69.pdf]

## Supplementary information for

### *Reconstructing emission pathways for developing countries*

Developing countries show a narrower distribution in annual average economic growth rates, whereas average emissions change rates are more variable. Over the period 2010-2020, the median annual average economic growth rate for developing countries stood at 2.6%, while emissions saw a median change rate of 2.4%. The annual average median change in carbon intensity was -0.14%. It's clear that annual average economic growth varied from 1.3%-4.1% (IQR), while annual average growth of emissions was 0.035%-4.6% in 2010-2020.

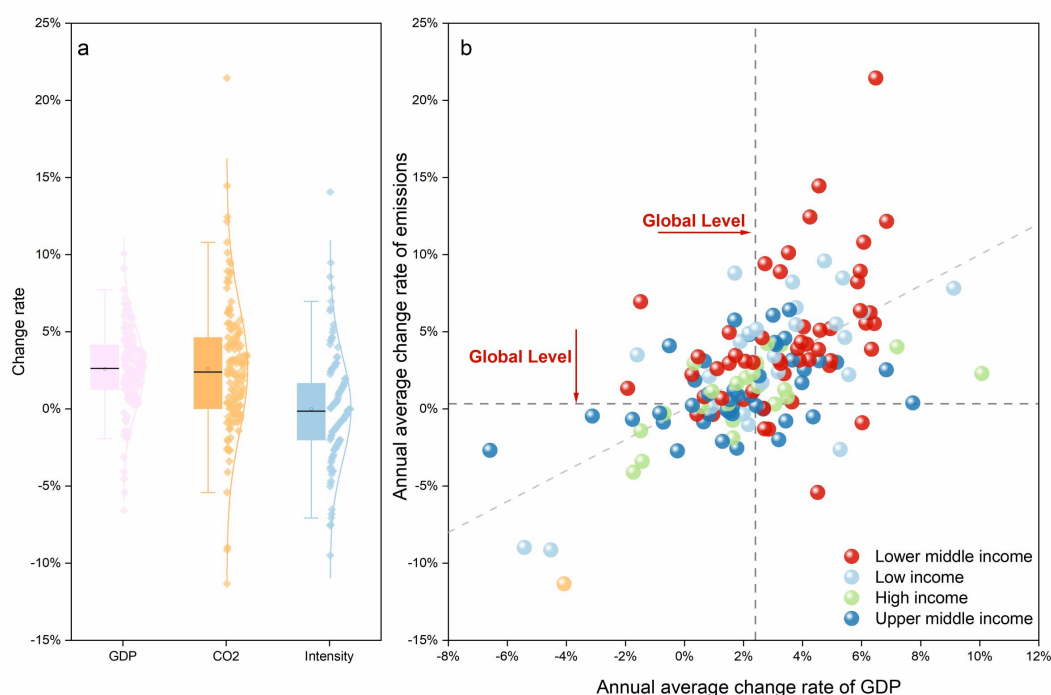

**Figure S1 Summary of economic progress and CO<sub>2</sub> emissions from 2010 to 2020 in developing countries.** (a) Overall annual average change rate of economic development, emissions and carbon intensity. The GDP, CO<sub>2</sub>, and carbon intensity of developing countries are shown in box plots with the quartiles, medians, whiskers, and outliers highlighted. The upper and bottom bounds of the boxes, which span the IQR, correspond to the 25th and 75th percentiles, respectively. The mean and median values are shown as circles and lines inside of boxes. The density and degree of dispersion of the data are shown by the scatter points adjacent to each box. (b) The average annual rate of change in economic growth and emissions for every country. The annual average rate of global economic growth and CO<sub>2</sub> emissions are shown by the horizontal and vertical grey dashed lines, respectively. The tilted gray dashed line signifies that the annual average change rate of emissions and GDP are equal. Various colors mean different income levels.

The economic growth and emissions across individual developing countries demonstrate a greater degree of heterogeneity in comparison to the overall observed of these countries. Among 143 developing countries, 65 rely on fossil fuels to drive their economic development, accounting for approximately 45% (at the left of the tilted gray dashed line in **Figure 1b**). Of these 65 countries,

26 43 are classified as low and lower-middle-income countries. The remaining developing countries  
 27 have experienced economic growth that surpasses their emissions growth, corresponding to a  
 28 decrease in carbon intensity. From 2010 to 2020, the global annual average growth rate of  
 29 emissions was 0.34%, while the annual average economic growth rate was 2.4%. Most of the  
 30 countries located between the vertical grey dashed line and the tilted grey dashed line are low- and  
 31 lower-middle-income countries. Compared to the global average annual emissions growth rate,  
 32 70.6% of developing countries exceed this level, while 54.5% have an economic growth rate  
 33 higher than the global average. For instance, Laos, a lower-middle-income country, recorded a  
 34 6.5% annual average economic growth alongside a 21.4% annual average rise in emissions from  
 35 2010 to 2020, resulting in the 14.1% annual average increase in carbon intensity. Similarly,  
 36 Zambia, also lower-middle-income, achieved 3.5% economic growth with a 10.1% emissions  
 37 increase. Burkina Faso, a low-income country, saw 5.4% economic growth and an 8.5% rise in  
 38 emissions. In contrast, Guyana, a high-income developing nation, managed 7.2% economic  
 39 growth and a 4% increase in emissions, resulting in a -3% change in carbon intensity.  
 40

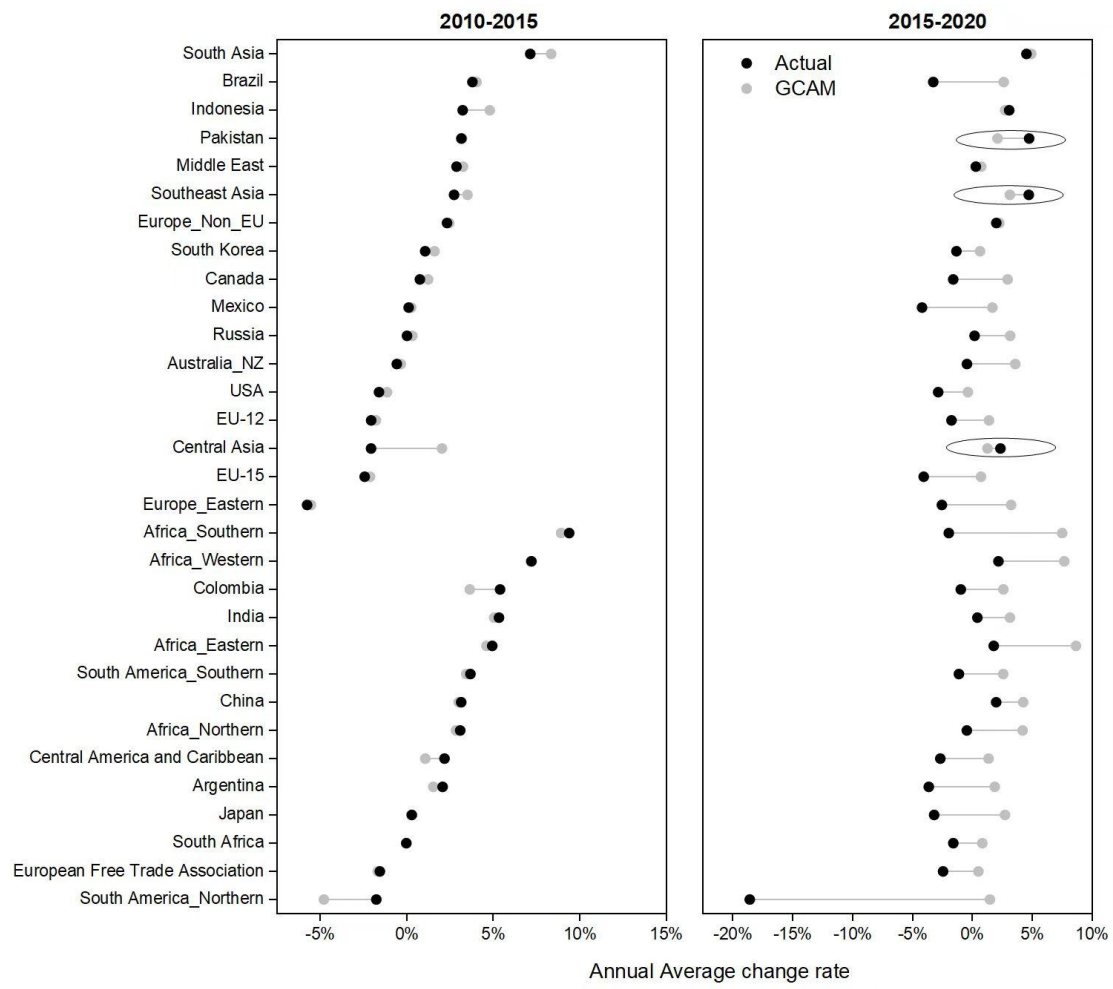

41  
 42 **Figure S2 Comparison of change rates for historical emission trends and data in GCAM.**

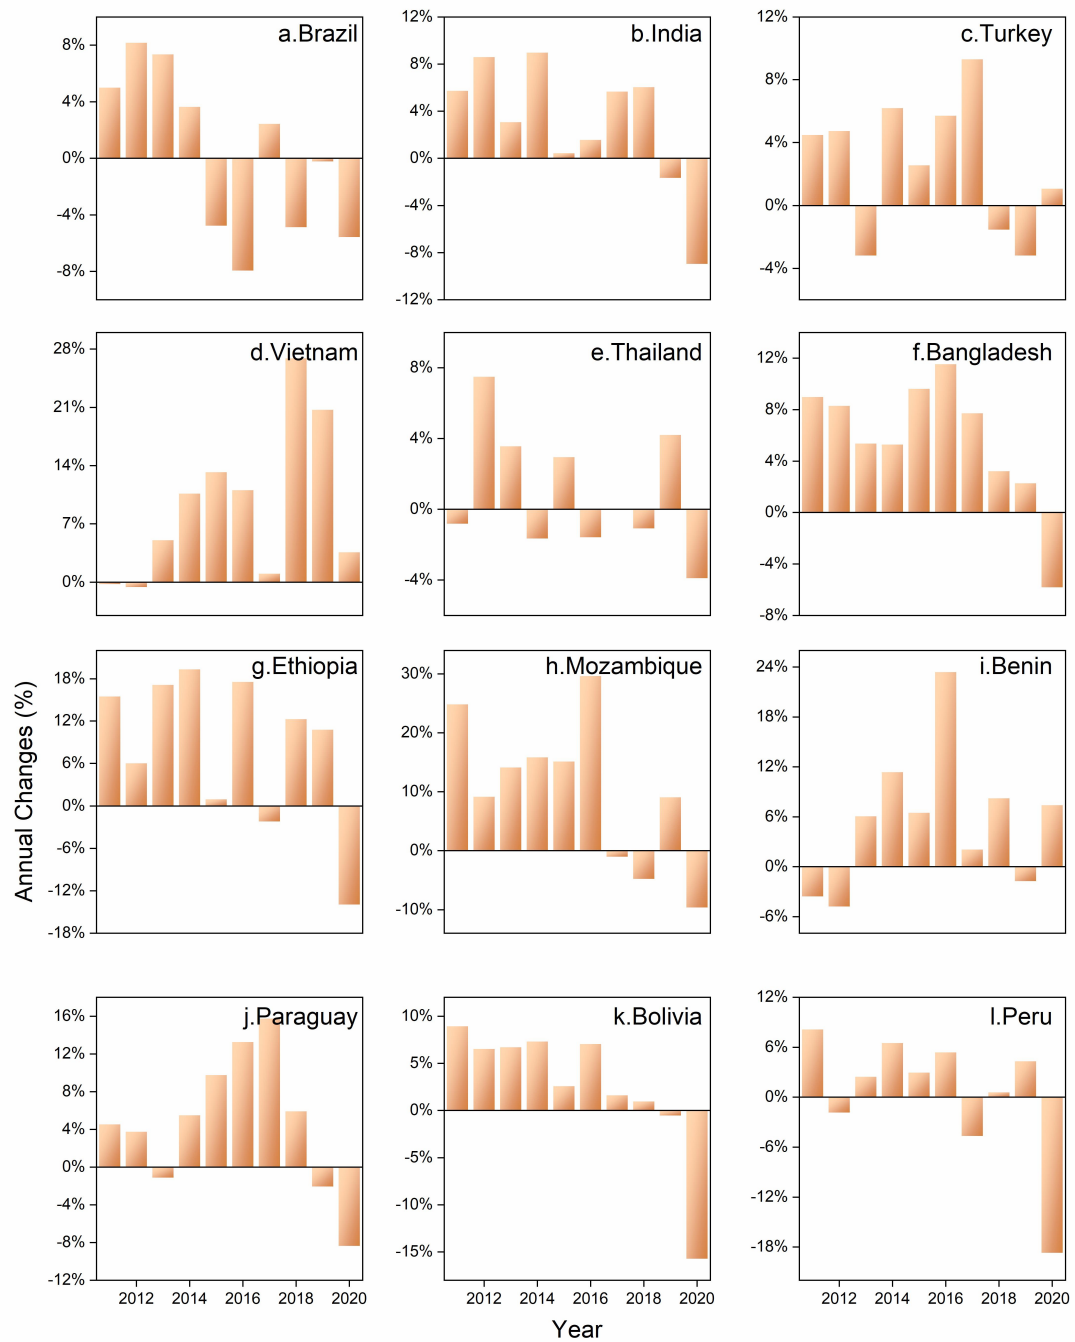

43

44

**Figure S3 The actual annual average rates of change in emissions.**

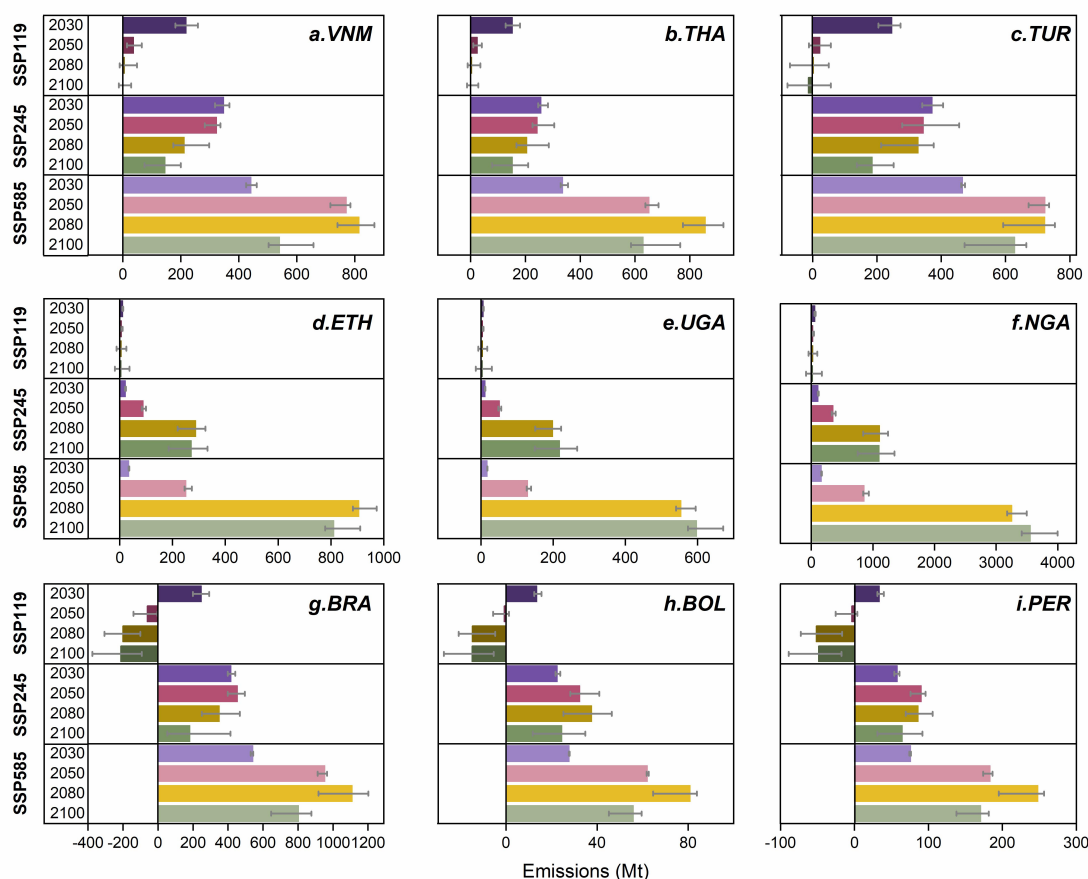

**Figure S4 Emission reduction pathways in selective countries under 3 scenarios.** a–i, CO<sub>2</sub> emissions from the three scenarios SSP 119, SSP 245, and SSP 585 in the following nine selective countries: Vietnam (a), Thailand (b), Turkey (c), Ethiopia (d), Uganda (e), Nigeria (f), Brazil (g), Bolivia (h) and Peru (i). Countries in the Asian region listed in the first row, followed by the African region, and the South American region. Each plot contains three selective years from the three scenarios. The length of the bars represents the median emissions from models. Error bars denote corresponding emissions from the 25th and 75th percentiles of scenarios across models.

Comparisons of the SSP 119, SSP 245, and SSP 585 scenarios reveals that emission reductions will not occur at a uniform pace across countries, highlighting disparities in the intensity of mitigation efforts. In 2050, emissions under the SSP119 and SSP245 scenarios were -62.2 Mt and 454.3 Mt in Brazil, respectively, with emission reductions of 106.5% and 52.4% relative to the SSP585 scenario (median, Figure 3). Emissions reach to median values of 257.1 Mt, 243.4 Mt and 205.1Mt and for 2030, 2050 and 2080 in Thailand under SSP245 (with interquartile range, IQR, of 245.9~282.1 Mt, 225.4~305.1 Mt and 167.4~285.5 Mt).

**Table S1 Illustrative of classification of emissions scenarios and CMIP6 scenarios.**

| Classification of emissions scenarios into warming levels: C1-C8 | CMIP6 scenarios |
|------------------------------------------------------------------|-----------------|
| C8 exceeding warming of 4°C ( $\geq 50\%$ )                      | SSP5-8.5        |
| C7 limit warming to 4°C ( $> 50\%$ )                             | SSP3-7.0        |
| C6 limit warming to 3°C ( $> 50\%$ )                             | SSP2-4.5        |

|                                                                  |          |
|------------------------------------------------------------------|----------|
| C5 limit warming to 2.5°C (>50%)                                 | SSP4-3.7 |
| C4 limit warming to 2°C (>50%)                                   |          |
| C3 limit warming to 2°C (>67%)                                   | SSP2-2.6 |
| C2 return warming to 1.5°C (>50%)<br>after a high overshoot      |          |
| C1 limit warming to 1.5°C (>50%)<br>with no or limited overshoot | SSP1-1.9 |

63

64 **Table S2 Classification of countries.**

65

| Regions                               | Countries           | ISO3 | Income level        | Sub-region    | Region | Developed  |
|---------------------------------------|---------------------|------|---------------------|---------------|--------|------------|
| Asian countries except Japan (R5ASIA) | China               | CHN  | Upper middle income | Eastern Asia  | Asia   | Developing |
|                                       | China Hong Kong SAR | HKG  | High income         | Eastern Asia  | Asia   | Developing |
|                                       | China Macao SAR     | MAC  | High income         | Eastern Asia  | Asia   | Developing |
|                                       | Mongolia            | MNG  | Upper middle income | Eastern Asia  | Asia   | Developing |
|                                       | Taiwan              |      |                     |               |        |            |
|                                       | Afghanistan         | AFG  | Low income          | Southern Asia | Asia   | Developing |
|                                       | Bangladesh          | BGD  | Lower middle income | Southern Asia | Asia   | Developing |
|                                       | Bhutan              | BTN  | Lower middle income | Southern Asia | Asia   | Developing |
|                                       | India               | IND  | Lower middle income | Southern Asia | Asia   | Developing |
|                                       | Maldives            | MDV  | Upper middle income | Southern Asia | Asia   | Developing |
|                                       | Nepal               | NPL  | Lower middle income | Southern Asia | Asia   | Developing |
|                                       | Pakistan            | PAK  | Lower middle income | Southern Asia | Asia   | Developing |
|                                       | Sri Lanka           | LKA  | Lower               | Southern      | Asia   | Developing |

|                                  |                                       |     |                     |                    |         |            |
|----------------------------------|---------------------------------------|-----|---------------------|--------------------|---------|------------|
|                                  |                                       |     | middle income       | Asia               |         |            |
|                                  | Brunei Darussalam                     | BRN | High income         | South-eastern Asia | Asia    | Developing |
|                                  | Cambodia                              | KHM | Lower middle income | South-eastern Asia | Asia    | Developing |
|                                  | Democratic People's Republic of Korea | PRK | Low income          | Eastern Asia       | Asia    | Developing |
|                                  | East Timor                            | TLS | Lower middle income | South-eastern Asia | Asia    | Developing |
|                                  | Indonesia                             | IDN | Upper middle income | South-eastern Asia | Asia    | Developing |
|                                  | Lao People's Democratic Republic      | LAO | Lower middle income | South-eastern Asia | Asia    | Developing |
|                                  | Malaysia                              | MYS | Upper middle income | South-eastern Asia | Asia    | Developing |
|                                  | Myanmar                               | MMR | Lower middle income | South-eastern Asia | Asia    | Developing |
|                                  | Papua New Guinea                      | PNG | Lower middle income | Melanesia          | Oceania | Developing |
|                                  | Philippines                           | PHL | Lower middle income | South-eastern Asia | Asia    | Developing |
|                                  | Republic of Korea                     | KOR | High income         | Eastern Asia       | Asia    | Developed  |
|                                  | Singapore                             | SGP | High income         | South-eastern Asia | Asia    | Developing |
|                                  | Thailand                              | THA | Upper middle income | South-eastern Asia | Asia    | Developing |
|                                  | Viet Nam                              | VNM | Lower middle income | South-eastern Asia | Asia    | Developing |
| Countries of the Middle East and | Bahrain                               | BHR | High income         | Western Asia       | Asia    | Developing |
|                                  | Iran (Islamic)                        | IRN | Upper               | Southern           | Asia    | Developing |

|                   |                         |     |                           |                        |        |            |
|-------------------|-------------------------|-----|---------------------------|------------------------|--------|------------|
| Africa<br>(R5MAF) | Republic of)            |     | middle<br>income          | Asia                   |        |            |
|                   | Iraq                    | IRQ | Upper<br>middle<br>income | Western<br>Asia        | Asia   | Developing |
|                   | Israel                  | ISR | High<br>income            | Western<br>Asia        | Asia   | Developed  |
|                   | Jordan                  | JOR | Lower<br>middle<br>income | Western<br>Asia        | Asia   | Developing |
|                   | Kuwait                  | KWT | High<br>income            | Western<br>Asia        | Asia   | Developing |
|                   | Lebanon                 | LBN | Lower<br>middle<br>income | Western<br>Asia        | Asia   | Developing |
|                   | Oman                    | OMN | High<br>income            | Western<br>Asia        | Asia   | Developing |
|                   | Qatar                   | QAT | High<br>income            | Western<br>Asia        | Asia   | Developing |
|                   | Saudi Arabia            | SAU | High<br>income            | Western<br>Asia        | Asia   | Developing |
|                   | Syrian Arab<br>Republic | SYR | Low<br>income             | Western<br>Asia        | Asia   | Developing |
|                   | United Arab<br>Emirates | ARE | High<br>income            | Western<br>Asia        | Asia   | Developing |
|                   | Yemen                   | YEM | Low<br>income             | Western<br>Asia        | Asia   | Developing |
|                   | Algeria                 | DZA | Upper<br>middle<br>income | Northern<br>Africa     | Africa | Developing |
|                   | Angola                  | AGO | Lower<br>middle<br>income | Sub-Sahara<br>n Africa | Africa | Developing |
|                   | Benin                   | BEN | Lower<br>middle<br>income | Sub-Sahara<br>n Africa | Africa | Developing |
|                   | Botswana                | BWA | Upper<br>middle<br>income | Sub-Sahara<br>n Africa | Africa | Developing |
|                   | Burkina Faso            | BFA | Low<br>income             | Sub-Sahara<br>n Africa | Africa | Developing |
|                   | Burundi                 | BDI | Low<br>income             | Sub-Sahara<br>n Africa | Africa | Developing |
|                   | Cote d'Ivoire           | CIV | Lower                     | Sub-Sahara             | Africa | Developing |

|  |                                  |     |                     |                    |        |            |
|--|----------------------------------|-----|---------------------|--------------------|--------|------------|
|  |                                  |     | middle income       | n Africa           |        |            |
|  | Cameroon                         | CMR | Lower middle income | Sub-Saharan Africa | Africa | Developing |
|  | Cape Verde                       | CPV | Lower middle income | Sub-Saharan Africa | Africa | Developing |
|  | Central African Republic         | CAF | Low income          | Sub-Saharan Africa | Africa | Developing |
|  | Chad                             | TCD | Low income          | Sub-Saharan Africa | Africa | Developing |
|  | Comoros                          | COM | Lower middle income | Sub-Saharan Africa | Africa | Developing |
|  | Congo                            | COG | Lower middle income | Sub-Saharan Africa | Africa | Developing |
|  | Democratic Republic of the Congo | COD | Low income          | Sub-Saharan Africa | Africa | Developing |
|  | Djibouti                         | DJI | Lower middle income | Sub-Saharan Africa | Africa | Developing |
|  | Egypt                            | EGY | Lower middle income | Northern Africa    | Africa | Developing |
|  | Equatorial Guinea                | GNQ | Upper middle income | Sub-Saharan Africa | Africa | Developing |
|  | Eritrea                          | ERI | Low income          | Sub-Saharan Africa | Africa | Developing |
|  | Ethiopia                         | ETH | Low income          | Sub-Saharan Africa | Africa | Developing |
|  | Gabon                            | GAB | Upper middle income | Sub-Saharan Africa | Africa | Developing |
|  | Gambia                           | GMB | Low income          | Sub-Saharan Africa | Africa | Developing |
|  | Ghana                            | GHA | Lower middle income | Sub-Saharan Africa | Africa | Developing |
|  | Guinea                           | GIN | Lower middle        | Sub-Saharan Africa | Africa | Developing |



|  |                        |     |                     |                    |        |            |
|--|------------------------|-----|---------------------|--------------------|--------|------------|
|  |                        |     | income              |                    |        |            |
|  | Guinea-Bissau          | GNB | Low income          | Sub-Saharan Africa | Africa | Developing |
|  | Kenya                  | KEN | Lower middle income | Sub-Saharan Africa | Africa | Developing |
|  | Lesotho                | LSO | Lower middle income | Sub-Saharan Africa | Africa | Developing |
|  | Liberia                | LBR | Low income          | Sub-Saharan Africa | Africa | Developing |
|  | Libyan Arab Jamahiriya | LBY | Upper middle income | Northern Africa    | Africa | Developing |
|  | Madagascar             | MDG | Low income          | Sub-Saharan Africa | Africa | Developing |
|  | Malawi                 | MWI | Low income          | Sub-Saharan Africa | Africa | Developing |
|  | Mali                   | MLI | Low income          | Sub-Saharan Africa | Africa | Developing |
|  | Mauritania             | MRT | Lower middle income | Sub-Saharan Africa | Africa | Developing |
|  | Mauritius              | MUS | Upper middle income | Sub-Saharan Africa | Africa | Developing |
|  | Morocco                | MAR | Lower middle income | Northern Africa    | Africa | Developing |
|  | Mozambique             | MOZ | Low income          | Sub-Saharan Africa | Africa | Developing |
|  | Namibia                | NAM | Upper middle income | Sub-Saharan Africa | Africa | Developing |
|  | Niger                  | NER | Low income          | Sub-Saharan Africa | Africa | Developing |
|  | Nigeria                | NGA | Lower middle income | Sub-Saharan Africa | Africa | Developing |
|  | Reunion                | REU |                     | Sub-Saharan Africa | Africa | Developing |
|  | Rwanda                 | RWA | Low income          | Sub-Saharan Africa | Africa | Developing |
|  | Senegal                | SEN | Lower               | Sub-Saharan        | Africa | Developing |

|                                  |                             |     |                     |                                 |          |            |
|----------------------------------|-----------------------------|-----|---------------------|---------------------------------|----------|------------|
|                                  |                             |     | middle income       | n Africa                        |          |            |
|                                  | Sierra Leone                | SLE | Low income          | Sub-Saharan Africa              | Africa   | Developing |
|                                  | Somalia                     | SOM | Low income          | Sub-Saharan Africa              | Africa   | Developing |
|                                  | South Africa                | ZAF | Upper middle income | Sub-Saharan Africa              | Africa   | Developing |
|                                  | Sudan                       | SDN | Low income          | Northern Africa                 | Africa   | Developing |
|                                  | Swaziland                   | SWZ | Lower middle income | Sub-Saharan Africa              | Africa   | Developing |
|                                  | Togo                        | TGO | Low income          | Sub-Saharan Africa              | Africa   | Developing |
|                                  | Tunisia                     | TUN | Lower middle income | Northern Africa                 | Africa   | Developing |
|                                  | Uganda                      | UGA | Low income          | Sub-Saharan Africa              | Africa   | Developing |
|                                  | United Republic of Tanzania | TZA | Lower middle income | Sub-Saharan Africa              | Africa   | Developing |
|                                  | Western Sahara              | ESH |                     | Northern Africa                 | Africa   | Developing |
|                                  | Zambia                      | ZMB | Lower middle income | Sub-Saharan Africa              | Africa   | Developing |
|                                  | Zimbabwe                    | ZWE | Lower middle income | Sub-Saharan Africa              | Africa   | Developing |
| Latin American countries (R5LAM) | Argentina                   | ARG | Upper middle income | Latin America and the Caribbean | Americas | Developing |
|                                  | Bahamas                     | BHS | High income         | Latin America and the Caribbean | Americas | Developing |
|                                  | Barbados                    | BRB | High income         | Latin America and the Caribbean | Americas | Developing |

|  |                    |     |                     |                                 |          |            |
|--|--------------------|-----|---------------------|---------------------------------|----------|------------|
|  | Belize             | BLZ | Upper middle income | Latin America and the Caribbean | Americas | Developing |
|  | Bolivia            | BOL | Lower middle income | Latin America and the Caribbean | Americas | Developing |
|  | Brazil             | BRA | Upper middle income | Latin America and the Caribbean | Americas | Developing |
|  | Chile              | CHL | High income         | Latin America and the Caribbean | Americas | Developing |
|  | Colombia           | COL | Upper middle income | Latin America and the Caribbean | Americas | Developing |
|  | Costa Rica         | CRI | Upper middle income | Latin America and the Caribbean | Americas | Developing |
|  | Cuba               | CUB | Upper middle income | Latin America and the Caribbean | Americas | Developing |
|  | Dominican Republic | DOM | Upper middle income | Latin America and the Caribbean | Americas | Developing |
|  | Ecuador            | ECU | Upper middle income | Latin America and the Caribbean | Americas | Developing |
|  | El Salvador        | SLV | Upper middle income | Latin America and the Caribbean | Americas | Developing |
|  | Guadeloupe         | GLP |                     | Latin America and the Caribbean | Americas | Developing |

|  |                      |     |                     |                                 |          |            |
|--|----------------------|-----|---------------------|---------------------------------|----------|------------|
|  | Guatemala            | GTM | Upper middle income | Latin America and the Caribbean | Americas | Developing |
|  | Guyana               | GUY | High income         | Latin America and the Caribbean | Americas | Developing |
|  | Haiti                | HTI | Lower middle income | Latin America and the Caribbean | Americas | Developing |
|  | Honduras             | HND | Lower middle income | Latin America and the Caribbean | Americas | Developing |
|  | Jamaica              | JAM | Upper middle income | Latin America and the Caribbean | Americas | Developing |
|  | Martinique           | MTQ |                     | Latin America and the Caribbean | Americas | Developing |
|  | Mexico               | MEX | Upper middle income | Latin America and the Caribbean | Americas | Developing |
|  | Netherlands Antilles | CUW | High income         | Latin America and the Caribbean | Americas | Developing |
|  | Nicaragua            | NIC | Lower middle income | Latin America and the Caribbean | Americas | Developing |
|  | Panama               | PAN | High income         | Latin America and the Caribbean | Americas | Developing |
|  | Paraguay             | PRY | Upper middle income | Latin America and the Caribbean | Americas | Developing |

|                                                           |                        |     |                     |                                 |          |            |
|-----------------------------------------------------------|------------------------|-----|---------------------|---------------------------------|----------|------------|
|                                                           | Peru                   | PER | Upper middle income | Latin America and the Caribbean | Americas | Developing |
|                                                           | Puerto Rico            | PRI | High income         | Latin America and the Caribbean | Americas | Developing |
|                                                           | Suriname               | SUR | Upper middle income | Latin America and the Caribbean | Americas | Developing |
|                                                           | Trinidad and Tobago    | TTO | High income         | Latin America and the Caribbean | Americas | Developing |
|                                                           | Uruguay                | URY | High income         | Latin America and the Caribbean | Americas | Developing |
|                                                           | Venezuela              | VEN | 0                   | Latin America and the Caribbean | Americas | Developing |
| OECD90 and EU (and EU candidate) countries (R5OECD90 +EU) | Albania                | ALB | Upper middle income | Southern Europe                 | Europe   | Developed  |
|                                                           | Austria                | AUT | High income         | Western Europe                  | Europe   | Developed  |
|                                                           | Belgium                | BEL | High income         | Western Europe                  | Europe   | Developed  |
|                                                           | Bosnia and Herzegovina | BIH | Upper middle income | Southern Europe                 | Europe   | Developed  |
|                                                           | Bulgaria               | BGR | High income         | Eastern Europe                  | Europe   | Developed  |
|                                                           | Croatia                | HRV | High income         | Southern Europe                 | Europe   | Developed  |
|                                                           | Cyprus                 | CYP | High income         | Western Asia                    | Asia     | Developed  |
|                                                           | Czech Republic         | CZE | High income         | Eastern Europe                  | Europe   | Developed  |
|                                                           | Denmark                | DNK | High income         | Northern Europe                 | Europe   | Developed  |

|  |             |     |                     |                 |        |           |
|--|-------------|-----|---------------------|-----------------|--------|-----------|
|  | Estonia     | EST | High income         | Northern Europe | Europe | Developed |
|  | Finland     | FIN | High income         | Northern Europe | Europe | Developed |
|  | France      | FRA | High income         | Western Europe  | Europe | Developed |
|  | Germany     | DEU | High income         | Western Europe  | Europe | Developed |
|  | Greece      | GRC | High income         | Southern Europe | Europe | Developed |
|  | Hungary     | HUN | High income         | Eastern Europe  | Europe | Developed |
|  | Iceland     | ISL | High income         | Northern Europe | Europe | Developed |
|  | Ireland     | IRL | High income         | Northern Europe | Europe | Developed |
|  | Italy       | ITA | High income         | Southern Europe | Europe | Developed |
|  | Latvia      | LVA | High income         | Northern Europe | Europe | Developed |
|  | Lithuania   | LTU | High income         | Northern Europe | Europe | Developed |
|  | Luxembourg  | LUX | High income         | Western Europe  | Europe | Developed |
|  | Macedonia   | MKD | Upper middle income | Southern Europe | Europe | Developed |
|  | Malta       | MLT | High income         | Southern Europe | Europe | Developed |
|  | Montenegro  | MNE | Upper middle income | Southern Europe | Europe | Developed |
|  | Netherlands | NLD | High income         | Western Europe  | Europe | Developed |
|  | Norway      | NOR | High income         | Northern Europe | Europe | Developed |
|  | Poland      | POL | High income         | Eastern Europe  | Europe | Developed |
|  | Portugal    | PRT | High income         | Southern Europe | Europe | Developed |
|  | Spain       | ESP | High income         | Southern Europe | Europe | Developed |
|  | Sweden      | SWE | High income         | Northern Europe | Europe | Developed |

|  |                          |     |                     |                           |          |            |
|--|--------------------------|-----|---------------------|---------------------------|----------|------------|
|  | Switzerland              | CHE | High income         | Western Europe            | Europe   | Developed  |
|  | Turkey                   | TUR | Upper middle income | Western Asia              | Asia     | Developing |
|  | United Kingdom           | GBR | High income         | Northern Europe           | Europe   | Developed  |
|  | Canada                   | CAN | High income         | Northern America          | Americas | Developed  |
|  | United States of America | USA | High income         | Northern America          | Americas | Developed  |
|  | Australia                | AUS | High income         | Australia and New Zealand | Oceania  | Developed  |
|  | Fiji                     | FJI | Upper middle income | Melanesia                 | Oceania  | Developing |
|  | French Polynesia         | PYF | High income         | Polynesia                 | Oceania  | Developing |
|  | Guam                     | GUM | High income         | Micronesia                | Oceania  | Developing |
|  | Japan                    | JPN | High income         | Eastern Asia              | Asia     | Developed  |
|  | New Caledonia            | NCL | High income         | Melanesia                 | Oceania  | Developing |
|  | New Zealand              | NZL | High income         | Australia and New Zealand | Oceania  | Developed  |
|  | Romania                  | ROU | High income         | Eastern Europe            | Europe   | Developed  |
|  | Samoa                    | WSM | Lower middle income | Polynesia                 | Oceania  | Developing |
|  | Serbia                   | SRB | Upper middle income | Southern Europe           | Europe   | Developed  |
|  | Slovakia                 | SVK | High income         | Eastern Europe            | Europe   | Developed  |
|  | Slovenia                 | SVN | High income         | Southern Europe           | Europe   | Developed  |
|  | Solomon Islands          | SLB | Lower middle income | Melanesia                 | Oceania  | Developing |
|  | Vanuatu                  | VUT | Lower               | Melanesia                 | Oceania  | Developing |

|                                                                           |                     |     |                     |                |        |            |
|---------------------------------------------------------------------------|---------------------|-----|---------------------|----------------|--------|------------|
|                                                                           |                     |     | middle income       |                |        |            |
| Countries from the Reforming Economies of the Former Soviet Union (R5REF) | Armenia             | ARM | Upper middle income | Western Asia   | Asia   | Developing |
|                                                                           | Azerbaijan          | AZE | Upper middle income | Western Asia   | Asia   | Developing |
|                                                                           | Belarus             | BLR | Upper middle income | Eastern Europe | Europe | Developed  |
|                                                                           | Georgia             | GEO | Upper middle income | Western Asia   | Asia   | Developing |
|                                                                           | Kazakhstan          | KAZ | Upper middle income | Central Asia   | Asia   | Developing |
|                                                                           | Kyrgyzstan          | KGZ | Lower middle income | Central Asia   | Asia   | Developing |
|                                                                           | Republic of Moldova | MDA | Upper middle income | Eastern Europe | Europe | Developed  |
|                                                                           | Russian Federation  | RUS | High income         | Eastern Europe | Europe | Developed  |
|                                                                           | Tajikistan          | TJK | Lower middle income | Central Asia   | Asia   | Developing |
|                                                                           | Turkmenistan        | TKM | Upper middle income | Central Asia   | Asia   | Developing |
|                                                                           | Ukraine             | UKR | Upper middle income | Eastern Europe | Europe | Developed  |
|                                                                           | Uzbekistan          | UZB | Lower middle income | Central Asia   | Asia   | Developing |
